# Supplementary material
Source: ML conference proceedings conference paper supplement (https://openaccess.thecvf.com/content/ACCV2022/html/Chung_Domain_Generalized_RPPG_ACCV_2022_paper.html)
Supplement: Supplementary file 1 [file Chung_Domain_Generalized_RPPG_ACCV_2022_supplemental.pdf]

# Domain Generalized RPPG Network: Disentangled Feature Learning with Domain Permutation and Domain Augmentation (Supplementary Material)

Wei-Hao Chung, Cheng-Ju Hsieh, Sheng-Hung Liu, and  
Chiou-Ting Hsu<sup>[0000-0001-8857-2481]</sup>

National Tsing Hua University, Hsinchu, Taiwan  
godofyax@gmail.com, peter55180831@gmail.com, oscar545407@gmail.com, and  
cthsu@cs.nthu.edu.tw

## 1 Network Architecture

Figures 1, 2, 3, 4, and 5 show the network architectures of the global feature encoder  $F$ , the extractor  $S$ , the decoder  $D$ , the rPPG estimator  $E$ , and the classifier  $C$  in DG-rPPGNet.

In Fig. 1, the global feature encoder  $F$  is a shallow module with only one convolutional layer.

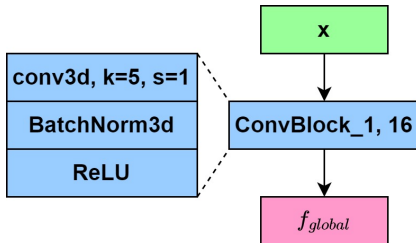

Fig. 1: The architecture of the global feature encoder  $F$ .

In Fig. 2, the rPPG extractor  $S_{rPPG}$ , the ID extractor  $S_{id}$ , and the domain extractor  $S_{domain}$  have the same architecture but different weights. Therefore, the output  $f_{extract}$  here corresponds to  $f_{rPPG}$ ,  $f_{id}$ , and  $f_{domain}$  in  $S_{rPPG}$ ,  $S_{id}$ , and  $S_{domain}$ , respectively.

In Fig. 3, the decoder  $D$  has two outputs (1) the reconstructed global feature  $f'_{global}$ ; and (2) the reconstructed video  $x'$ .

Fig. 4 is the architecture of the proposed rPPG estimator  $E$ .  $E_{rPPG}^{global}$  and  $E_{rPPG}^{disent}$  have same architecture but different weights. Here, we include the self-attention mechanism [1] after each ST-Module to guide our rPPG estimator to focus on skin regions instead of the background.

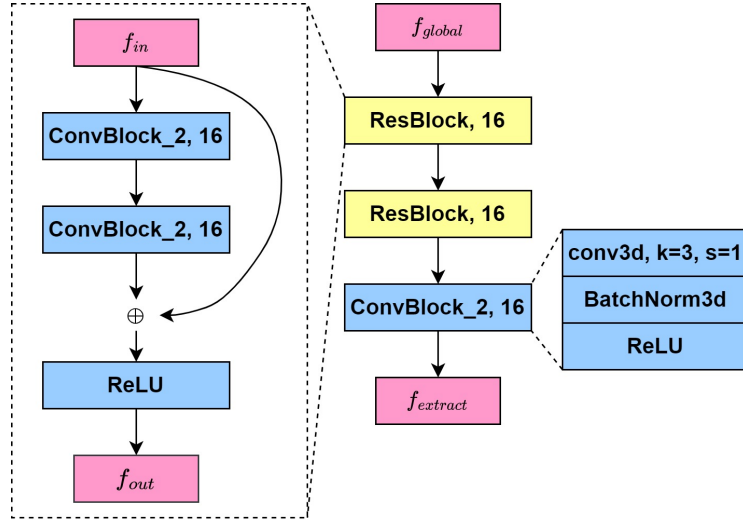

Fig. 2: The architecture of the extractor  $S$ .  $\oplus$  indicates the element-wise addition.

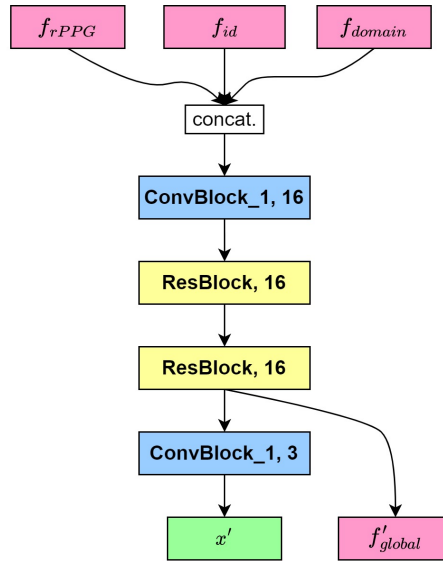

Fig. 3: The architecture of the decoder  $D$ .

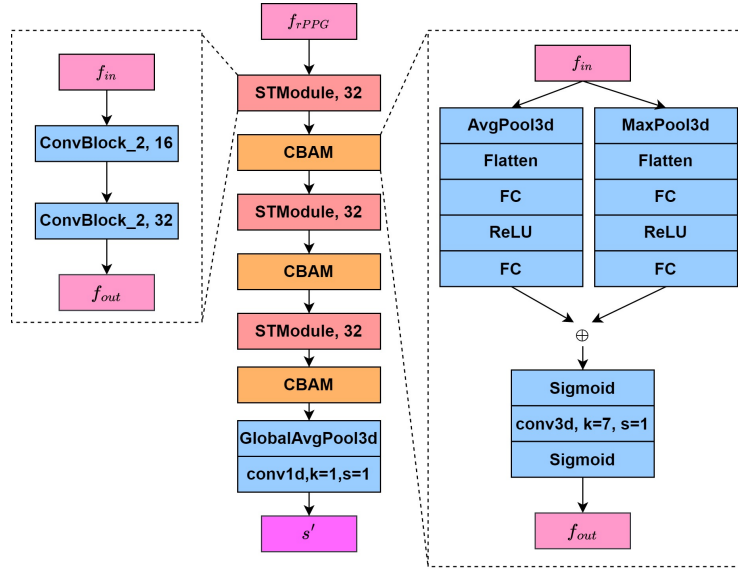

Fig. 4: The architecture of the rPPG estimator  $E$ .

Fig. 5 is the architecture of the proposed classifier  $C$ .  $C_{id}$  and  $C_{domain}$  have the same architecture but different weights. Therefore, the output  $y'$  here corresponds to  $y'^{id}$  and  $y'^{domain}$  in  $C_{id}$  and  $C_{domain}$ , respectively.

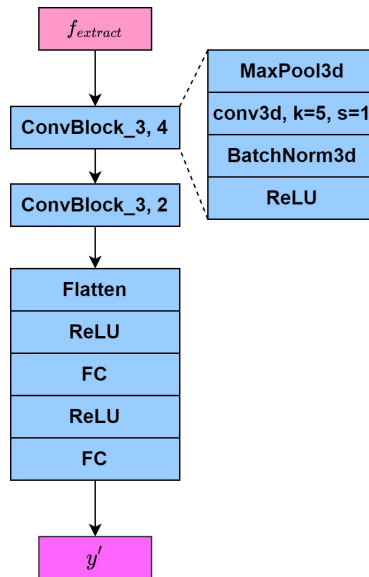

Fig. 5: The architecture of the classifier  $C$ .

## References

1. Woo, S., Park, J., Lee, J.Y., Kweon, I.S.: Cbam: Convolutional block attention module. In: Proceedings of the European conference on computer vision (ECCV). (2018) 3–19
